# Supplementary material
Source: Springer Nature journal article supplement (https://www.springermedizin.de/resource/supplementary/12885_2013_4854_MOESM3_ESM.pdf/9467524)

## A Analysis grouping by the Clinicopathological Subtypes

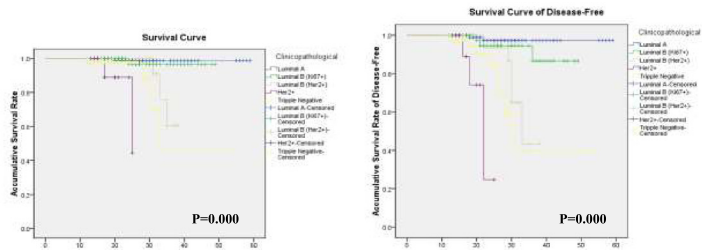

## B Cox proportional hazards model and Analysis grouping by the Patterns of Tumor Enhancement

Cox proportional hazards model of biological factors (including tumor enhancement mode under CT)

| Parameters                   | Death |        | Tumor Progression |        |
|------------------------------|-------|--------|-------------------|--------|
|                              | Sig.  | EXP(B) | Sig.              | EXP(B) |
| Age                          | 0.395 | 0.946  | 0.114             | 0.933  |
| Menopause                    | 0.916 | 1.116  | 0.533             | 0.676  |
| Family History               | 0.935 | 1.121  | 0.174             | 0.199  |
| Tumor Diameter               | 0.219 | 1.447  | 0.029             | 1.596  |
| Quadrant                     | 0.662 | 1.159  | 0.383             | 1.253  |
| Patterns of Enhancement (CT) | 0.035 | 4.555  | 0.000             | 10.311 |
| Histological Grade           | 0.476 | 0.511  | 0.395             | 1.711  |
| Cancer Thrombosis            | 0.228 | 0.331  | 0.793             | 0.839  |
| Lymph Node metastasis        | 0.037 | 9.384  | 0.020             | 4.542  |
| ER                           | 0.243 | 0.361  | 0.594             | 0.723  |
| PgR                          | 0.439 | 0.516  | 0.155             | 0.405  |
| HER2                         | 0.042 | 4.091  | 0.047             | 2.910  |
| Ki67                         | 0.352 | 2.197  | 0.054             | 3.538  |
| P53                          | 0.947 | 0.999  | 0.942             | 1.001  |

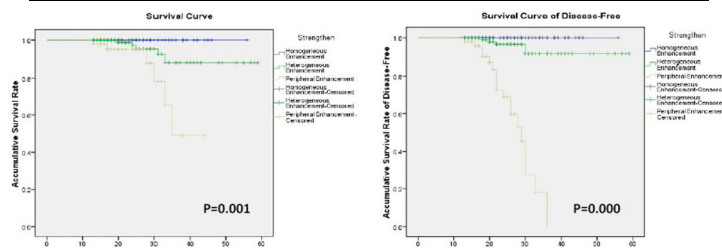

## C Cox proportional hazards model and Analysis grouping by the Distribution of MVD

Cox proportional hazards model of biological factors (including difference of MVD)

| Parameters            | Death |        | Tumor Progression |         |
|-----------------------|-------|--------|-------------------|---------|
|                       | Sig.  | EXP(B) | Sig.              | EXP(B)  |
| Age                   | 0.113 | 0.900  | 0.021             | 0.905   |
| Menopause             | 0.852 | 0.814  | 0.421             | 0.581   |
| Family History        | 0.580 | 0.495  | 0.063             | 0.144   |
| Tumor Diameter        | 0.469 | 1.244  | 0.051             | 1.506   |
| Quadrant              | 0.783 | 1.113  | 0.333             | 1.299   |
| Grade of DMVD         | 0.005 | 62.369 | 0.000             | 112.292 |
| Histological Grade    | 0.845 | 0.838  | 0.584             | 1.366   |
| Cancer Thrombosis     | 0.213 | 0.274  | 0.967             | 1.027   |
| Lymph Node metastasis | 0.017 | 19.393 | 0.033             | 4.827   |
| ER                    | 0.477 | 0.486  | 0.961             | 1.034   |
| PgR                   | 0.714 | 0.708  | 0.495             | 0.658   |
| HER2                  | 0.299 | 2.028  | 0.148             | 2.041   |
| Ki67                  | 0.266 | 2.775  | 0.026             | 4.180   |
| P53                   | 0.335 | 1.014  | 0.145             | 1.015   |

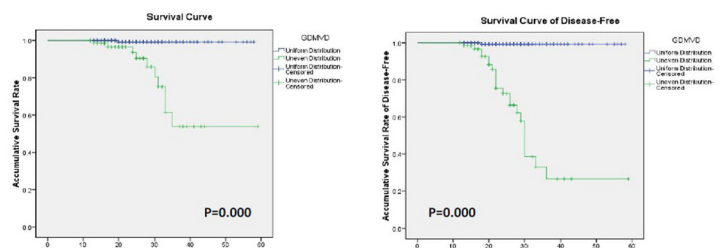

Supplement: MOESM3 [file 9467524]
